# Supplementary material for: A Quantitative Systems Pharmacology Model of the Pathophysiology and Treatment of COVID-19 Predicts Optimal Timing of Pharmacological Interventions
Source: bioRxiv or medRxiv preprint supplement (doi:10.1101/2021.12.07.21267277), 2021-12-08
Supplement: Supplementary file [file media-2.pdf]

# Supplementary Equations

December 2, 2021

## 2-compartment PK model for bamlanivimab and etesevimab

$$\begin{aligned}\frac{dAb_{1c}}{dt} &= -Ab_{1c} \cdot \frac{CL_{Ab_{1c}}}{V_{Ab_{1c}}} - Q_a \cdot \frac{Ab_{1c}}{V_{Ab_{1c}}} + Q_a \cdot \frac{Ab_{1p}}{V_{Ab_{1p}}} \\ \frac{dAb_{1p}}{dt} &= Q_a \cdot \frac{Ab_{1c}}{V_{Ab_{1c}}} - Q_a \cdot \frac{Ab_{1p}}{V_{Ab_{1p}}} \\ \frac{dAb_{2c}}{dt} &= -Ab_{2c} \cdot \frac{CL_{Ab_{2c}}}{V_{Ab_{2c}}} - Q_b \cdot \frac{Ab_{2c}}{V_{Ab_{2c}}} + Q_b \cdot \frac{Ab_{2p}}{V_{Ab_{2p}}} \\ \frac{dAb_{2p}}{dt} &= Q_b \cdot \frac{Ab_{2c}}{V_{Ab_{2c}}} - Q_b \cdot \frac{Ab_{2p}}{V_{Ab_{2p}}}\end{aligned}$$

## Equations describing phenomenological logarithmic activation of innate immune cells

### 1 Dendritic Cell Maturation ( $DC$ )

$$\begin{aligned}\frac{dDC}{dt} &= \alpha_{DC} \left[ k_V \cdot \log(V) + k_I \cdot \log(I) + k_D \log(DAT1 + DAT2) \right] \left[ k_{DC(TNF)} \cdot \left( \frac{(TNF\alpha)}{K_{DC(TNF)} + (TNF\alpha)} \right) + \right. \\ &k_{DC(IFN\gamma)} \cdot \left( \frac{(IFN\gamma)}{K_{DC(IFN\gamma)} + (IFN\gamma)} \right) + k_{DC(GM-CSF)} \cdot \left( \frac{(GM-CSF)}{K_{DC(GM-CSF)} + (GM-CSF)} \right) \left. \right] \\ &\left[ \frac{K_{DC(IL10)}}{K_{DC(IL10)} + (IL10)} \right] - \beta_{DC} \cdot (DC)\end{aligned}$$

Mature ( $DC$ ) are formed upon recognition of viral particles ( $V$ ), infected cells ( $I$ ), and damaged ( $AT1$ ) and ( $AT2$ ) cells. ( $DC$ ) maturation is further induced by ( $TNF\alpha$ ), ( $IFN\gamma$ ), ( $GM-CSF$ ), and inhibited by ( $IL10$ ). Mature ( $DC$ ) undergo nonspecific clearance at a rate  $\beta_{DC}$ .

## 2 Macrophage Activation ( $M1$ )

$$\begin{aligned} \frac{dM1}{dt} = & \alpha_{M1} \left[ k_V \cdot \log(V) + k_I \cdot \log(I) + k_D \log(DAT1 + DAT2) \right] \left[ k_{M1(TNF)} \cdot \left( \frac{(TNF\alpha)}{K_{M1(TNF)} + (TNF\alpha)} \right) + \right. \\ & \left. k_{M1(IFN\gamma)} \cdot \left( \frac{(IFN\gamma)}{K_{DC(IFN\gamma)} + (IFN\gamma)} \right) + k_{M1(GM-CSF)} \cdot \left( \frac{(GM-CSF)}{K_{M1(GM-CSF)} + (GM-CSF)} \right) \right] \\ & \left[ \frac{K_{M1(IL10)}}{K_{M1(IL10)} + (IL10)} \right] - \beta_{M1} \cdot (M1) \end{aligned}$$

Activated ( $M1$ ) are formed upon recognition of viral particles ( $V$ ), infected cells ( $I$ ), and damaged ( $AT1$ ) and ( $AT2$ ) cells. ( $M1$ ) activation is induced by ( $TNF\alpha$ ), ( $IFN\gamma$ ), ( $GM-CSF$ ), and inhibited by ( $IL10$ ). Activated ( $M1$ ) undergo nonspecific clearance at a rate  $\beta_{M1}$ .

## 3 Neutrophil Activation ( $N$ )

$$\begin{aligned} \frac{dN}{dt} = & \alpha_N \left[ k_V \cdot \log(V) + k_I \cdot \log(I) + k_D \log(DAT1 + DAT2) \right] \left[ k_{M1(TNF)} \cdot \left( \frac{(TNF\alpha)}{K_{M1(TNF)} + (TNF\alpha)} \right) + \right. \\ & \left. k_{M1(IFN\gamma)} \cdot \left( \frac{(IFN\gamma)}{K_{DC(IFN\gamma)} + (IFN\gamma)} \right) + k_{M1(GM-CSF)} \cdot \left( \frac{(GM-CSF)}{K_{M1(GM-CSF)} + (GM-CSF)} \right) \right] \\ & k_{trN} \cdot N_c \cdot \left( \frac{(IL17)}{k_{mN\_IL17} + (IL17)} \right) - \beta_N \cdot N - k_{tr(N)} \cdot N \end{aligned}$$

Activated ( $N$ ) are formed upon recognition of viral particles ( $V$ ), infected cells ( $I$ ), and damaged ( $AT1$ ) and ( $AT2$ ) cells. ( $N$ ) activation is induced by ( $TNF\alpha$ ), ( $IFN\gamma$ ), ( $GM-CSF$ ), and inhibited by ( $IL10$ ). Activated ( $N$ ) undergo nonspecific clearance at a rate  $\beta_N$ . Activated ( $N$ ) migration is also induced by ( $IL17$ ).
